# Supplementary material
Source: Springer Nature journal article supplement (https://www.springermedizin.de/resource/supplementary/12935_2009_232_MOESM4_ESM.pdf/9540134)

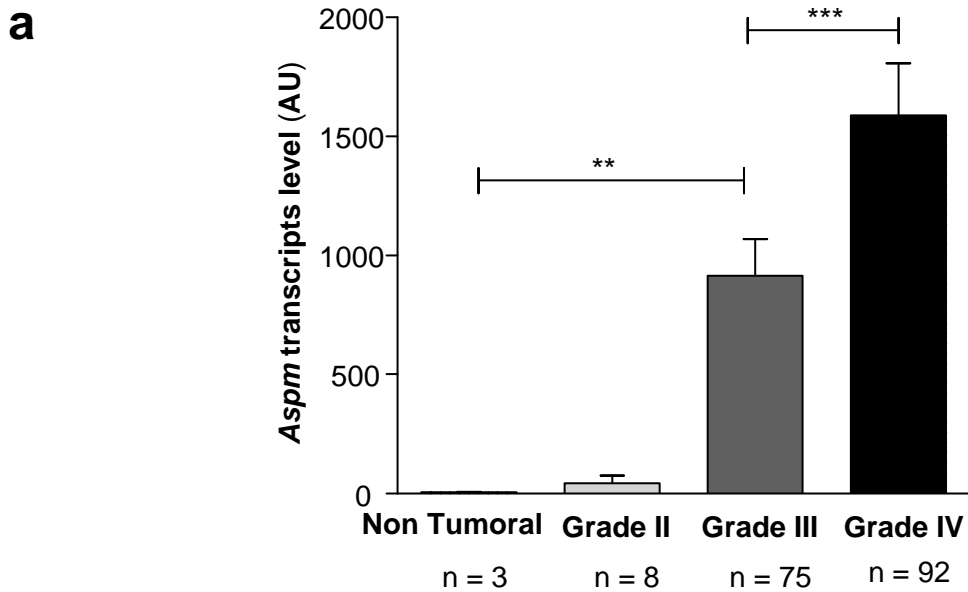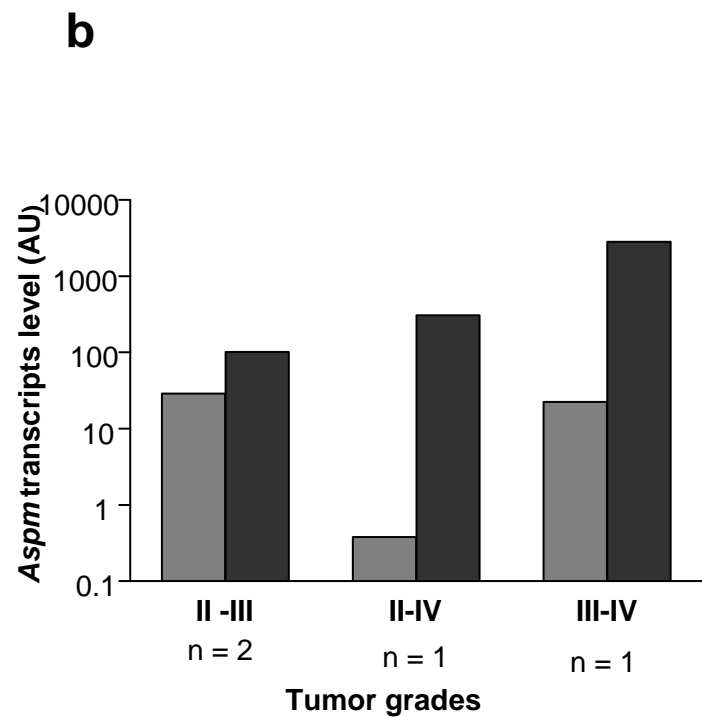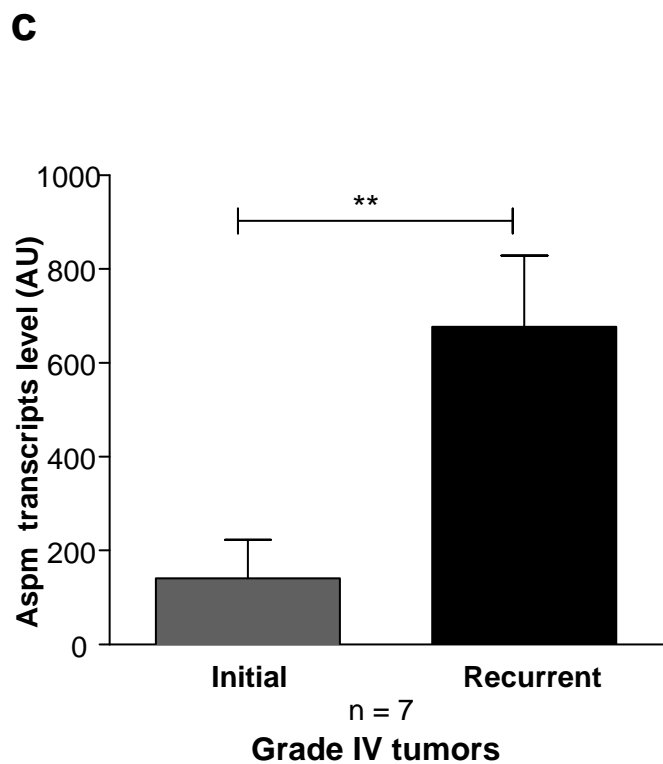

Supplement: MOESM4 [file 9540134]
